# Supplementary material for: Highly efficient and selective photocatalytic hydroamination of alkynes by supported gold nanoparticles using visible light at ambient temperature
Source: Royal Society of Chemistry journal article supplement (doi:10.1039/c3cc38985e), 2013-01-01
Supplement: c3cc38985e.pdf [file c3cc38985e.pdf]

## Supplementary Information for

### Highly Efficient and Selective Photocatalytic Hydroamination of Alkynes by Supported Gold Nanoparticles Using Visible Light at Ambient Temperature

*Jian Zhao, Zhanfeng Zheng, Steven Bottle, Alison Chou, Sarina Sarina, and Huaiyong Zhu\**

School of Chemistry, Physics and Mechanism Engineering, Queensland University of Technology, Brisbane, Qld 4001, Australia.

#### Experimental Details

**Supports preparation:** All chemicals were used as purchased from Sigma Aldrich (except P25 that was from Degussa, Germany) without further purification. Supports such as CeO<sub>2</sub> (50 nm BET), ZrO<sub>2</sub> (< 100 nm TEM), Fe<sub>2</sub>O<sub>3</sub> (< 5 micron), Al<sub>2</sub>O<sub>3</sub> (~100 mesh) were used as purchased from Sigma Aldrich. The nanofibre supports of TiO<sub>2</sub> based materials including TiO<sub>2</sub>(B), TiO<sub>2</sub>(anatase), and nitrogen doped TiO<sub>2</sub>(B) nanofibres were synthesized through various post treatment of hydrogen titanate (H<sub>2</sub>Ti<sub>3</sub>O<sub>7</sub>) fibers. Generally, 6 g of anatase particles (~325 mesh from Aldrich) was mixed with 80 mL of 10 M NaOH. The suspensions were sonicated in an ultrasonic bath for 0.5 h and then transferred into an autoclave with a PTFE container inside. The autoclave was maintained at hydrothermal temperature of 180 °C for 48 h. The precipitate (sodium titanate nanofibres) was recovered, washed with distilled water (to remove excess NaOH), exchanged with H<sup>+</sup> (using a 0.1 M HCl solution) to produce H<sub>2</sub>Ti<sub>3</sub>O<sub>7</sub> nanofibres, and washed again in with distilled water until pH~7 was reached. The H<sub>2</sub>Ti<sub>3</sub>O<sub>7</sub> nanofibre product was dried at 80 °C for 12 h. TiO<sub>2</sub>(B) nanofibres was obtained by calcining the hydrogen titanate fibres at 723 K for 3 h. TiO<sub>2</sub>(anatase) nanofibres support was synthesized by the hydrothermal reaction of H-titanate with dilute (0.05 M) HNO<sub>3</sub> solution for 62 h and then calcining at 723 K for 3 h. Nitrogen doped TiO<sub>2</sub>(B) nanofibres (with trace amount of anatase) were obtained by calcining H-titanate nanofibres at 550 °C in ammonia gas flow for 3 h, and denoted as TiO<sub>2</sub>-N or TiO<sub>2</sub>(B).N.

**Photocatalysts preparation:** A reduction method was used to load AuNPs on to the different supports. Briefly, 2.5 g of support powder was dispersed into 100 mL of a given concentration of HAuCl<sub>4</sub> solution. 20 mL of 0.53 M lysine was added under magnetic stirring and the stirring continued for 30 min. To this suspension, 10 mL of 0.35 M NaBH<sub>4</sub> solution was then slowly added. Following

this, 10 mL of 0.3 M hydrochloric acid was added and the mixture was allowed to stand for 24 h. Finally, the solid formed was separated, washed with deionized water and ethanol, and dried at 70 °C. The prepared AuNPs on different supports were denoted as Au/TiO<sub>2</sub>(anatase), Au/CeO<sub>2</sub>, Au/Al<sub>2</sub>O<sub>3</sub>, etc.

**Photocatalytic reduction test:** Hydroamination of alkynes was undertaken in argon atmosphere at 40 °C unless otherwise specified. In a typical reaction, 2 mmol alkyne and 2 mmol amine were dissolved into 2 mL toluene, into which 0.10 g photocatalyst was added. The flask was then filled with argon for 1 min to eliminate the air. After that, the reaction mixture was illuminated with visible light (500 W Halogen Lamp, light intensity was tested to be 0.43 W/cm<sup>2</sup>) for 25 h under magnetic stirring. Due to the low energy consumption of LEDs, the photocatalytic hydroamination of 4-phenyl-1-butyne for Au/TiO<sub>2</sub>(B) was also conducted using LED as light source while keeping other reaction conditions unchanged (The conversion achieved 45% after the reaction of 6 h). Fans or an air conditioner were used to keep the temperature during the reaction to be 40 °C. The liquid products were filtered and analyzed using an Agilent HP-6890 GC with a HP-5 column.

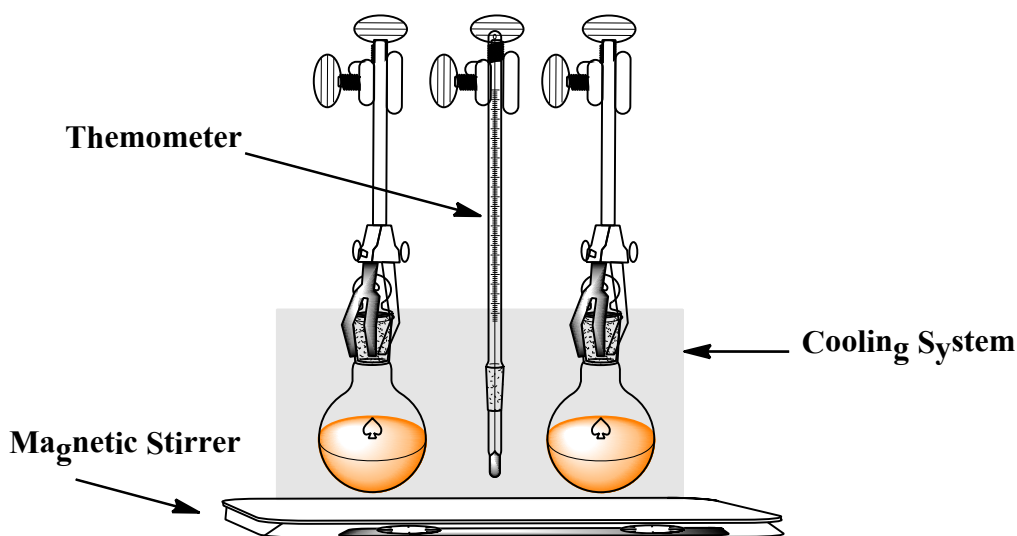

The irradiating light source coming from Halogen lamp put in the front of reaction systems, behind the reaction systems is the cooling system (fans or/and air conditioner). Thermometer was used to monitor the reaction temperature during the reaction. The cooling system was adjusted to maintain the temperature at 40 °C and the reaction flasks were put into the system after the temperature kept stable.

**Characterization:** Transmission electron microscopic (TEM) images were taken with a Philips CM200 Transmission electron microscope employing an accelerating voltage of 200 kV. The UV-Vis diffuse reflectance spectra of the samples were recorded on a Cary 5000 UV-Vis-NIR

Spectrophotometer. The Raman spectra of the samples were measured on inVia Renishaw microscope Raman, the excitation source was He-Ne laser (785 nm). FT-IR measurements were conducted on NEXUS 870 FT-IR (SMART ENDURANCE), Thermo Nicolet, and the IES measurements on a Digilab FTS-60A spectrometer equipped with a TGS detector, which was modified by replacing the IR source with an emission cell.

**Table S1. Photocatalytic hydroamination of 4-phenyl-1-butyne by different gold contents on TiO<sub>2</sub>-N**

| Sample                     | Conv. (%) <sup>a</sup> | d. (nm) <sup>b</sup> | S <sub>Au</sub> (m <sup>2</sup> /g) <sup>c</sup> | S <sub>Au</sub> (m <sup>2</sup> ) <sup>d</sup> |
|----------------------------|------------------------|----------------------|--------------------------------------------------|------------------------------------------------|
| 1wt%Au/TiO <sub>2</sub> -N | 67                     | 4.6                  | 73                                               | 0.7                                            |
| 2wt%Au/TiO <sub>2</sub> -N | 71                     | 5.0                  | 68                                               | 1.4                                            |
| 3wt%Au/TiO <sub>2</sub> -N | 90                     | 5.1                  | 66                                               | 2.0                                            |

[a] Conversion of 4-phenyl-1-butyne determined by GC analysis. [b] Average diameter of AuNPs, estimated from more than 200 AuNPs in the transmission electron microscopy (TEM) analysis. [c] Specific surface area of AuNPs. [d] Total surface area of AuNPs per gram of Au/TiO<sub>2</sub>-N is calculated from the specific surface area of AuNPs.

The specific surface area of AuNPs is calculated according to  $S_{Au} \text{ (m}^2\text{/g)} = C_1S_1 + C_2S_2 + \dots + C_nS_n$ .  $S_n$  was obtained from following equation:

$$S_n = \frac{A_n}{m_n} = \frac{4\pi\left(\frac{d_n}{2}\right)^2}{\rho V_n} = \frac{\pi d_n^2}{\rho \cdot \frac{4}{3}\pi\left(\frac{d_n}{2}\right)^3} = \frac{6}{\rho d_n}$$

where  $C_n$  is the ratio of AuNPs with the diameter of  $d_n$ ,  $\rho$  is the density of gold,  $19.30 \text{ g}\cdot\text{cm}^{-3}$ ,  $d_n$  is the diameter of AuNPs in certain range,  $\mu\text{m}$ .

#### Reference

1. Janz, A., Köockritz, A., Yao, L. & Martin, A. Fundamental calculations on the surface area determination of supported gold nanoparticles by alkanethiol adsorption. *Langmuir* 26, 6783-6789 (2010).

**Table S2. Photocatalytic hydroamination of 4-phenyl-1-butyne with aniline by AuNPs on different supports<sup>a</sup>**

| Entry | Photocatalysts                | Conv. (%) <sup>b</sup> | S <sub>I</sub> (%) <sup>c</sup> | S <sub>K</sub> (%) <sup>d</sup> |
|-------|-------------------------------|------------------------|---------------------------------|---------------------------------|
| 1     | Au/TiO <sub>2</sub> (B)       | 76                     | 94                              | 2                               |
| 2     | Au/TiO <sub>2</sub> (B).N     | 90                     | 91                              | 1                               |
| 3     | Au/TiO <sub>2</sub> (anatase) | 59                     | 90                              | 5                               |
| 4     | Au/P25                        | 70                     | 95                              | 4                               |
| 5     | Au/ZrO <sub>2</sub>           | 35                     | 95                              | 2                               |
| 6     | Au/CeO <sub>2</sub>           | 0.4                    | 100                             | -                               |

<sup>a</sup> Reaction conditions: 0.015 mmol of AuNPs, 4-phenyl-1-butyne (2 mmol), aniline (2 mmol), 2 ml of toluene as solvent, reacted under visible light at 40 °C for 25 h, argon atmosphere. <sup>b</sup> Determined by GC analysis. <sup>c</sup> Selectivity to imine. <sup>d</sup> Selectivity to ketone.

The gold content according to analysis of energy dispersion X-ray spectroscopy (EDX) and particle size distribution (TEM analysis) on the different supports were similar.

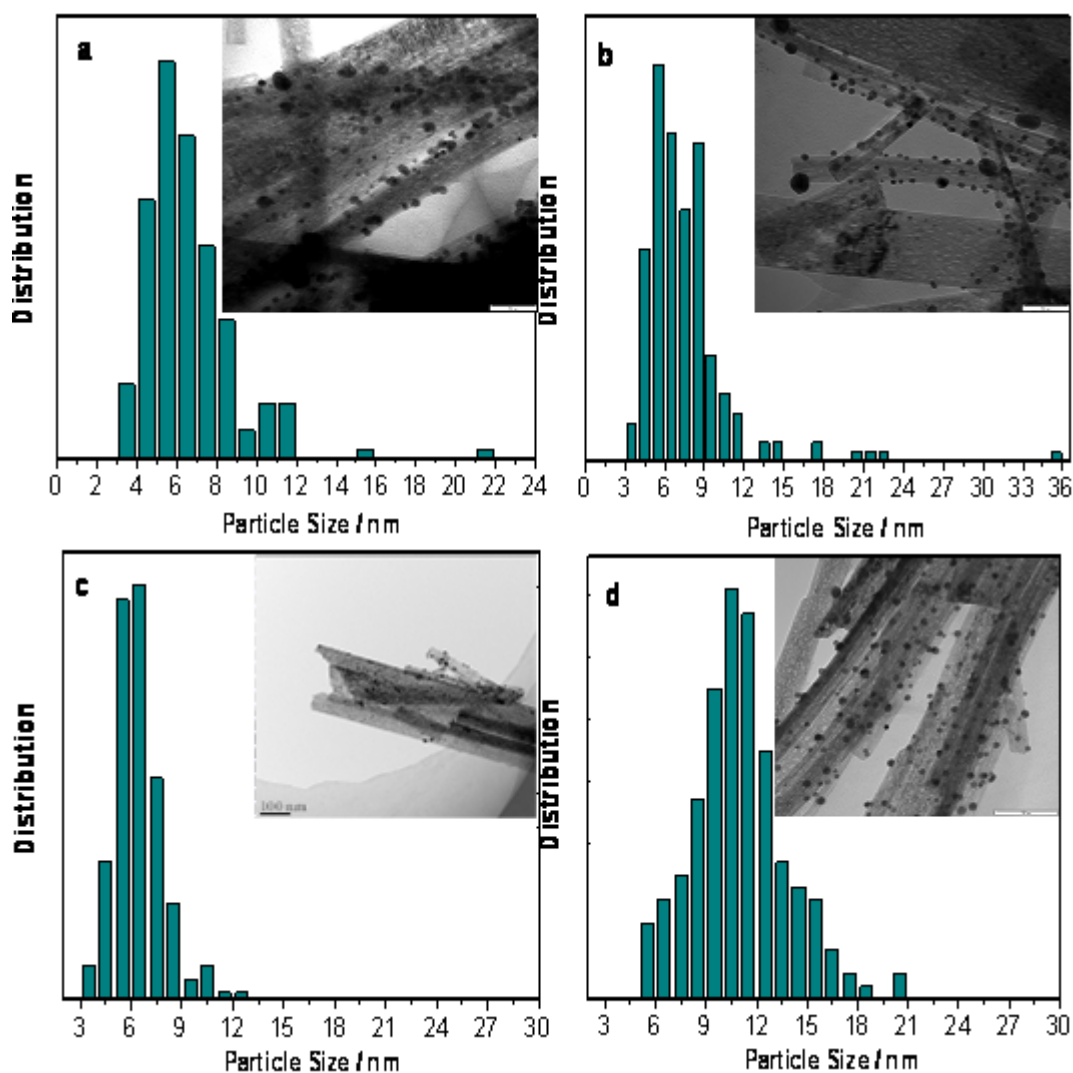

**Figure S1.** The size distribution of AuNPs on TiO<sub>2</sub>(B) according to TEM analysis. [a] 2wt% Au/TiO<sub>2</sub>(B), 50 nm scale; [b] 2wt% Au/TiO<sub>2</sub>(B) calcined at 300 °C for 3 h, 50 nm scale; [c] 3wt% Au/TiO<sub>2</sub>(B), 100 nm scale; [d] 3wt% Au/TiO<sub>2</sub>(B) calcined at 400 °C for 12 h, 100 nm scale.

The difference between Au/CeO<sub>2</sub> and other catalysts in Table S2 is sufficient to make a catalyst active or inactive while supported Au NPs with small difference (2 nm) cannot make a catalyst active or inactive. For example, conversion difference is only 3% for 2wt% Au/TiO<sub>2</sub>(B) and 2wt% Au/TiO<sub>2</sub>(B) calcined at 300 °C (size difference of AuNPs 1-2 nm), while 20% for Au/TiO<sub>2</sub>(B) and Au/TiO<sub>2</sub>(B) calcined at 400 °C (size difference of AuNPs ≥ 5 nm).

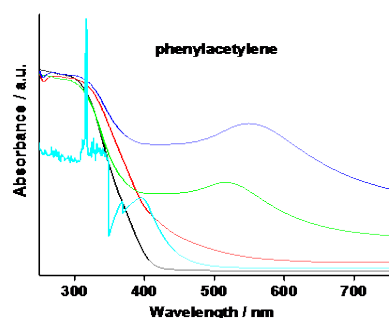

**Figure S2.** UV-Vis spectra of TiO<sub>2</sub>(B) (black line), Au/TiO<sub>2</sub>(B) (green line), alkynes adsorbed on TiO<sub>2</sub>(B) (red line) and Au/TiO<sub>2</sub>(B) (blue line), and free liquid alkynes (cyan line).

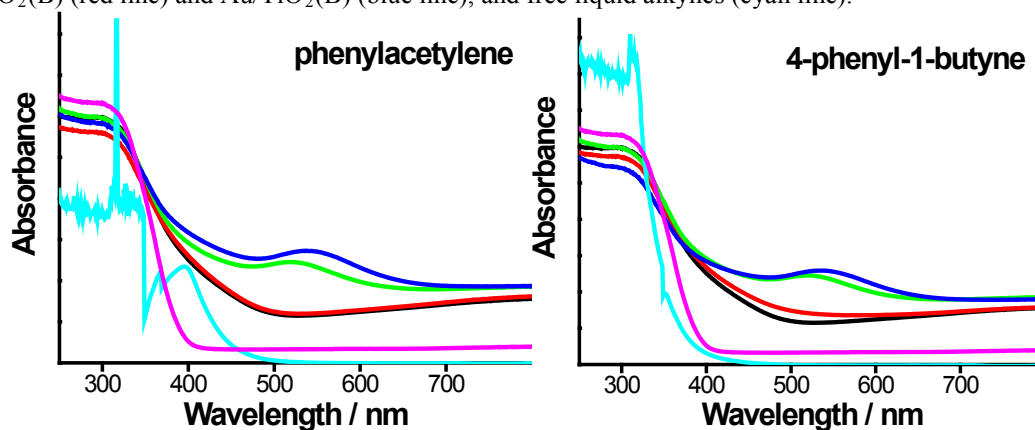

**Figure S3.** UV-Vis spectra of TiO<sub>2</sub>(B) (Magenta), TiO<sub>2</sub>N (black line), Au/TiO<sub>2</sub>N (green line), alkynes adsorbed on TiO<sub>2</sub>N (red line) and Au/TiO<sub>2</sub>N (blue line), and free liquid alkynes (cyan line).

The nitrogen doped TiO<sub>2</sub> systems absorb visible light, and thus the contribution from the adsorbed alkyne cannot be demonstrated clearly in their UV-Vis spectra.

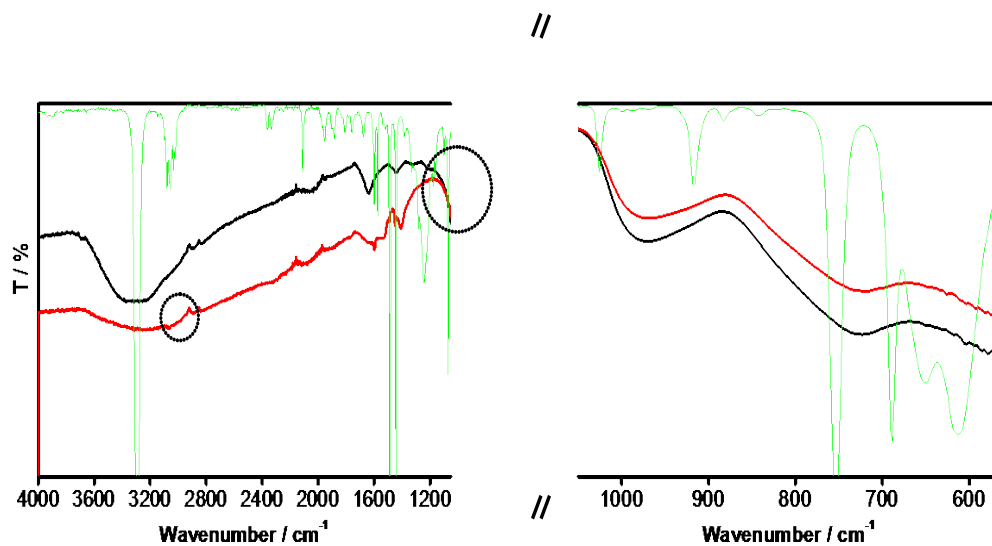

**Figure S4.** FT-IR of free liquid phenylacetylene (green line),  $\text{TiO}_2\cdot\text{N}$  (black line), phenylacetylene (0.1 g) adsorbed on  $\text{TiO}_2\cdot\text{N}$  (0.02 g) after dried at 60 °C under vacuum (red line). The bands in the range of 3300-3200  $\text{cm}^{-1}$  are attributed to C-H stretching vibration of  $\equiv\text{C-H}$ .

The experiment using only alkynes as reactant under the same reaction conditions was conducted. No polymerization or even no coupling product was observed (GC-MS method with HP-5 column). Therefore, the disappearance of the alkyne signals is not due to the polymerization of alkynes.



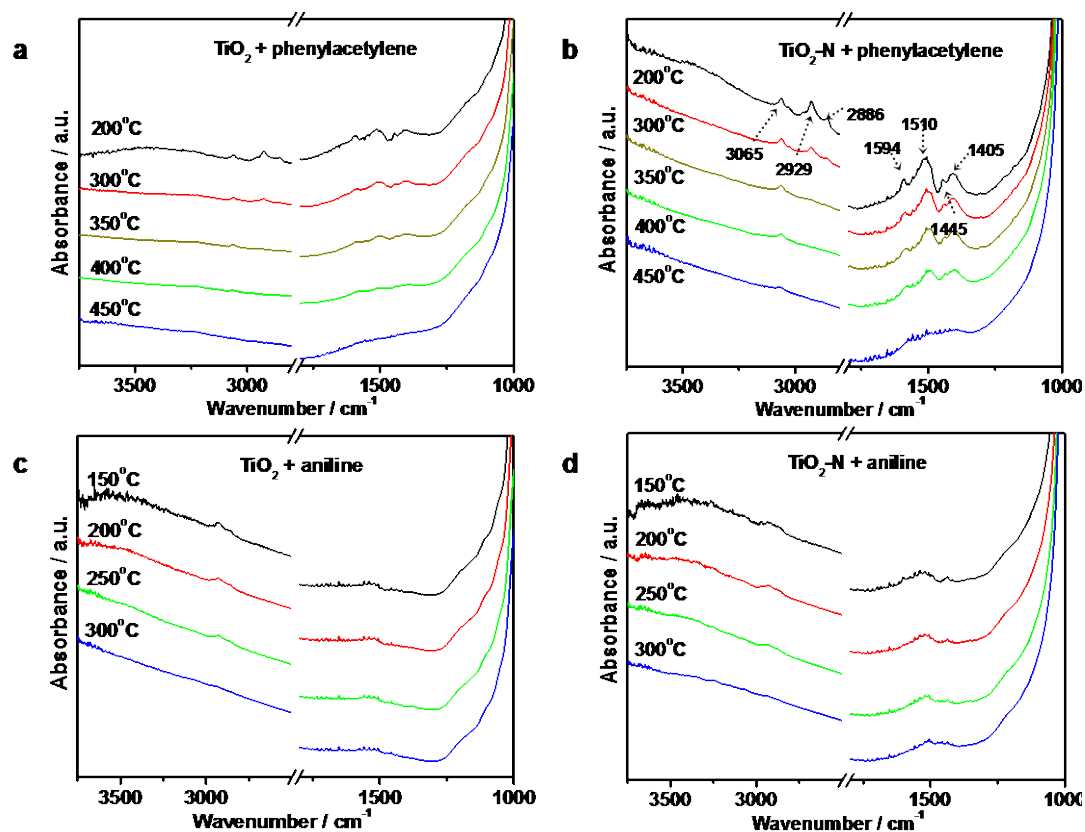

**Figure S5.** IES spectra of phenylacetylene (a and b) and aniline (c and d) adsorbed on different catalysts. Experiment condition: phenylacetylene or aniline (0.1 g) was added onto the prepared catalyst (0.02 g), then dried at 60 °C under vacuum.

At 400 °C, the peaks from phenylacetylene adsorbed on the surface of N doped TiO<sub>2</sub> are still obvious (Figure S5b), whereas these peaks cannot be observed from the sample with undoped TiO<sub>2</sub> (Figure S5a). This indicates that at this temperature phenylacetylene is not adsorbed on to undoped TiO<sub>2</sub>, and the surface of N-doped TiO<sub>2</sub> has a stronger ability to adsorb and thereby activate phenylacetylene than undoped TiO<sub>2</sub>. Such activation contributes to the higher photocatalytic activity for this catalyst. Furthermore, aniline adsorption on undoped (Figure S5c) and N-doped TiO<sub>2</sub> surface (Figure S5d) is negligible, compared with the adsorption of phenylacetylene as almost all the adsorbed aniline desorbed at 250 °C.

The reaction was conducted in the dark at several temperatures. When we increased the reaction temperature from 40 °C to 50 °C, the increase of the conversion (< 40%) is much lower than the increase induced by the visible light irradiation (> 60%). In our system, the AuNPs account for only 3 wt% of the catalyst mass. Namely, each reaction cycle we use only 3 mg of AuNPs (in 2 ml toluene as solvent), the heat produced by the AuNPs should have very limited impact. Moreover, the temperature of the reaction mixture was carefully controlled and maintained at 40 ±1 °C in the reaction irradiated with light. Thus, the temperature increase caused by the heat produced by the AuNPs under the visible light irradiation should be much less than 10 °C. Therefore, the contribution from the heat is much less than that from light irradiation. The most contribution comes from the electron transfer rather than the heat produced by AuNPs.
